# Supplementary material for: Effects of MicroRNA‐195‐5p on Biological Behaviors and Radiosensitivity of Lung Adenocarcinoma Cells via Targeting HOXA10
Source: Hindawi journal article supplement (doi:10.1155/2021/4522210), 2021-01-01

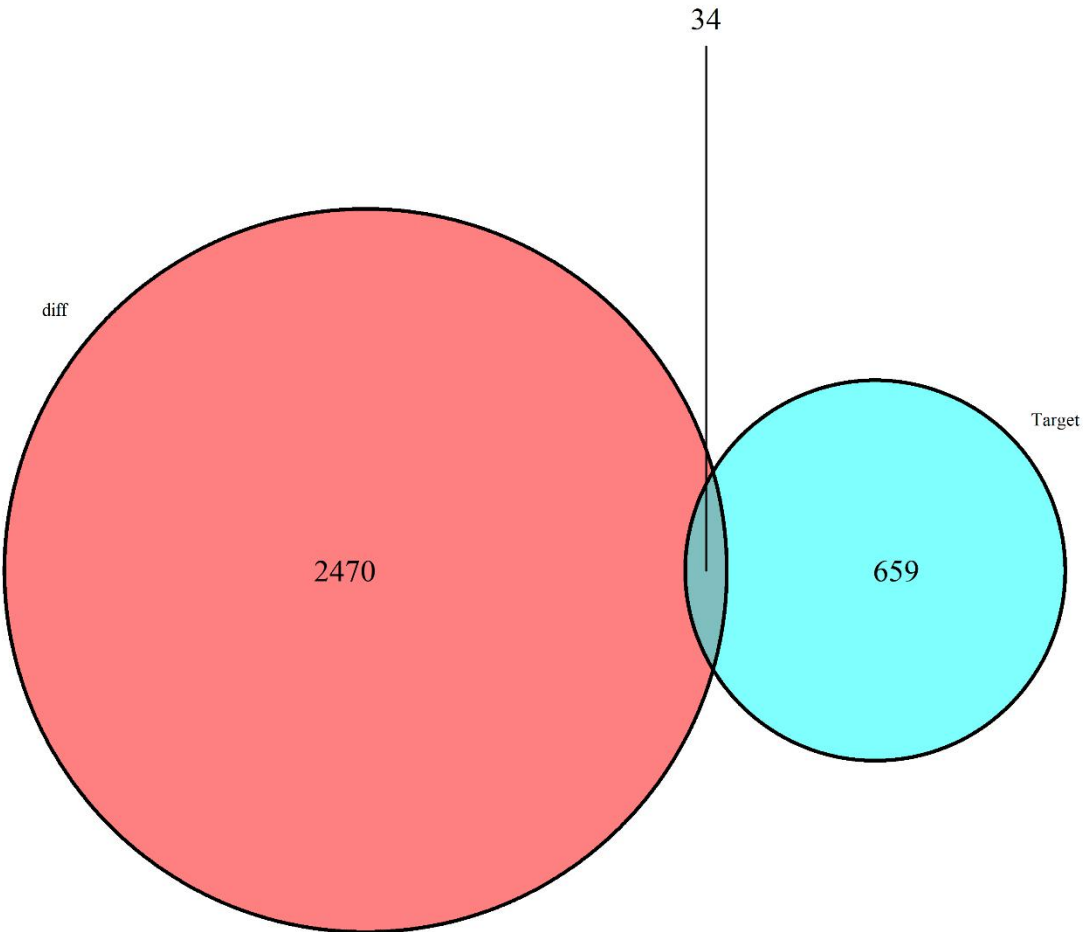

Supplement: f1 [file 4522210.f1.pdf]
