# Supplementary material for: Effects of MicroRNA‐195‐5p on Biological Behaviors and Radiosensitivity of Lung Adenocarcinoma Cells via Targeting HOXA10
Source: Hindawi journal article supplement (doi:10.1155/2021/4522210), 2021-01-01

# Supplemental Figure S3

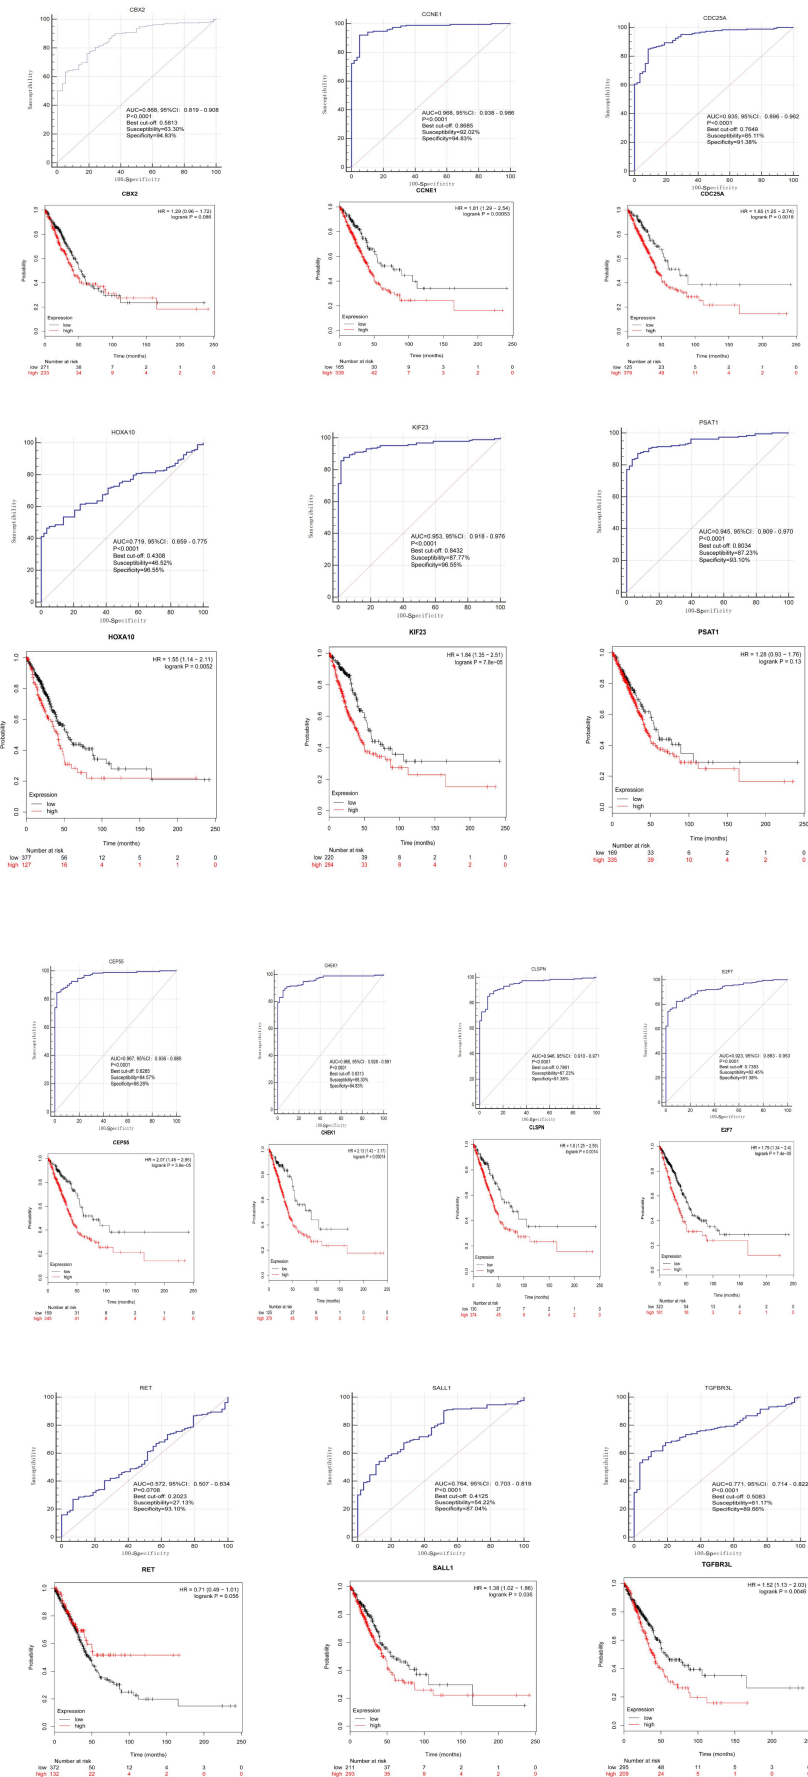

Supplement: f3 [file 4522210.f3.pdf]
